# Supplementary material
Source: PubMed Central journal article supplement (PMC4307953)
Supplement: NIHMS653219-supplement-supporting_information.pdf [file NIHMS653219-supplement-supporting_information.pdf]

## Supplementary Information

### **Stable biofunctionalization of hydroxyapatite (HA) surfaces by HA-binding/osteogenic modular peptides for inducing osteogenic differentiation of mesenchymal stem cells**

*Alessandro Polini,<sup>a,†,\*</sup> Jianglin Wang,<sup>b</sup> Hao Bai,<sup>a</sup> Ye Zhu,<sup>b</sup> Antoni P. Tomsia,<sup>a</sup> Chuanbin Mao<sup>a,b,\*</sup>*

<sup>a</sup> Materials Sciences Division, Lawrence Berkeley National Laboratory, Berkeley, CA 94720, USA

<sup>b</sup> Department of Chemistry and Biochemistry, Stephenson Life Sciences Research Center, University of Oklahoma, Norman, OK 73019, USA

<sup>†</sup> Present Address: Dept. of Biomaterials, Radboud University Nijmegen Medical Centre, 6525 EX Nijmegen, Netherlands

E-mail address: [alessandro.polini@radboudumc.nl](mailto:alessandro.polini@radboudumc.nl) (AP), [cbmao@ou.edu](mailto:cbmao@ou.edu) (CM).

| Gene  | Sequence of primer                                        | Length of fragment |
|-------|-----------------------------------------------------------|--------------------|
| ALP   | 5'-GTGCCCTGACTGAGGCTGTC-3'<br>5'-GGATCATCGTGTCTGCTCAC-3'  | 80bp               |
| OCN   | 5'-AAAGCCCAGCGACTCT-3'<br>5'-CTAAACGGTGGTGCCATAGAT-3'     | 232bp              |
| OPN   | 5'-GACGGCCGAGGTGATAGCTT-3'<br>5'-CATGGCTGGTCTTCCCGTTGC-3' | 209bp              |
| Runx2 | 5'-GCTTCTCCAACCCACGAATG-3'<br>5'-GAACTGATAGGACGCTGACGA-3' | 213bp              |
| Arbp  | 5'-CGACCTGGAAGTCCAACACTAC-3'<br>5'-ATCTGCTGCATCTGCTTG-3'  | 109bp              |

**Table S1.** Primer sequences for Real-time PCR analysis.

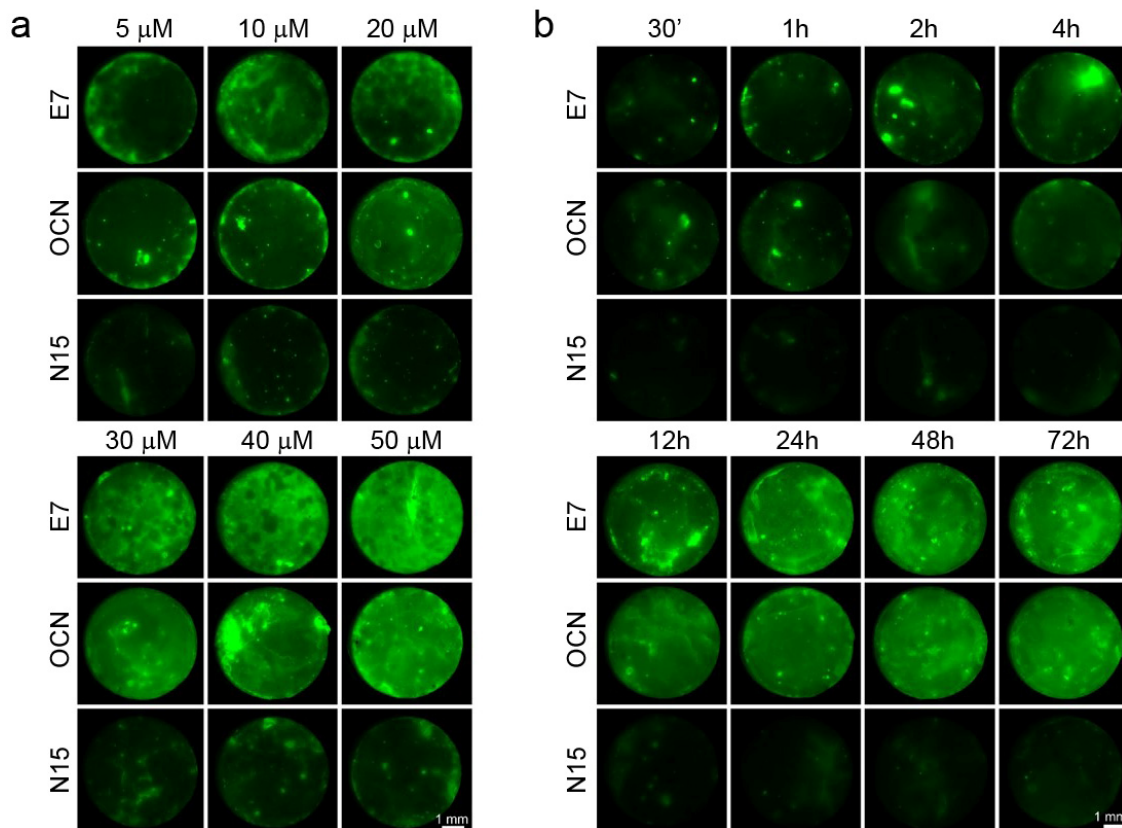

**Fig. S1.** HA discs functionalized with FITC-labeled HA-binding peptides at different concentrations (a) and incubation times (b).

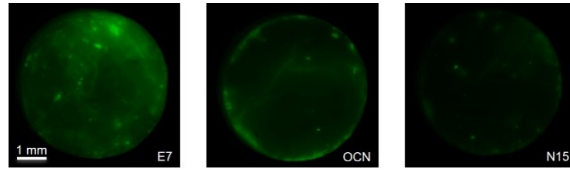

**Fig. S2.** Fluorescent images of HA discs functionalized with FITC-labeled HA-binding peptides after the release test (1 month).

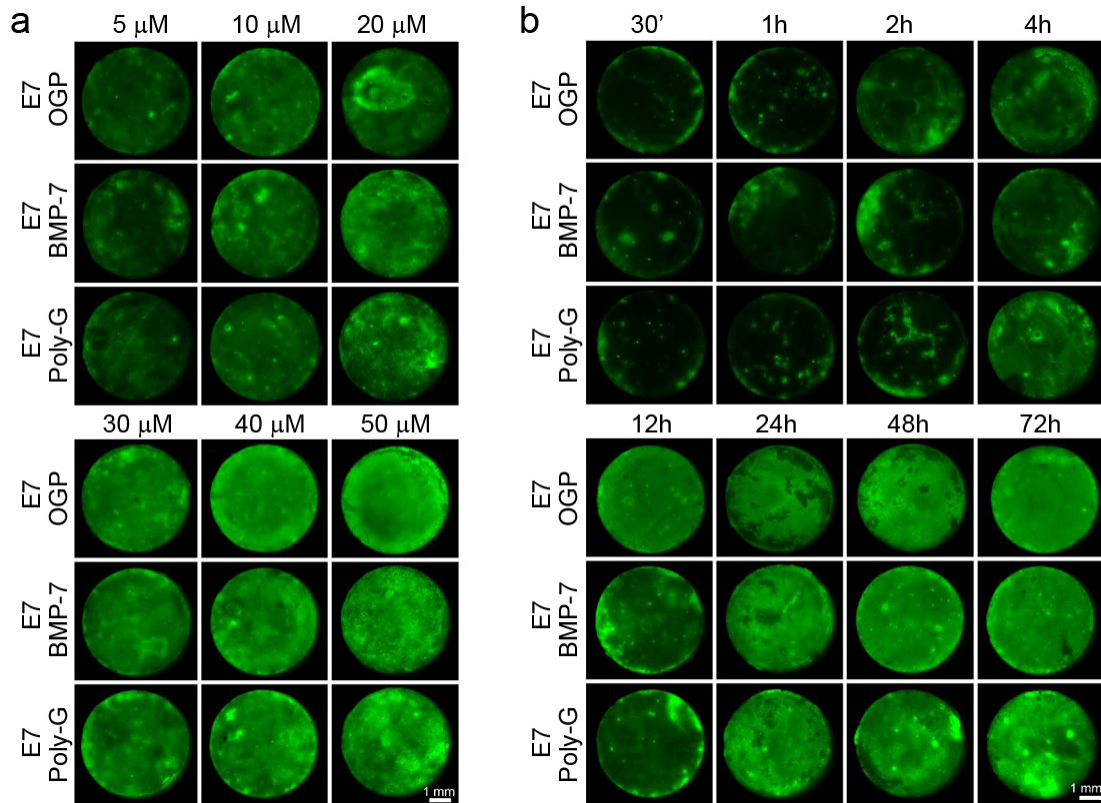

**Fig. S3.** HA discs functionalized with FITC-labeled modular peptides at different concentrations (a) and incubation times (b).

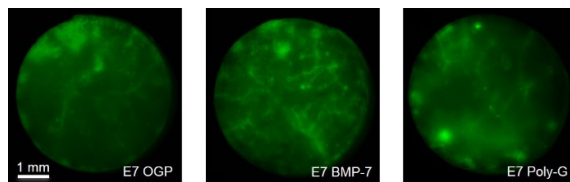

**Fig. S4.** Fluorescent images of HA discs functionalized with FITC-labeled modular peptides after the release test (1 month).
